# Supplementary material for: Hepatic NF-kB-inducing kinase (NIK) suppresses mouse liver regeneration in acute and chronic liver diseases
Source: eLife. 2018 Aug 2;7:e34152. doi: 10.7554/eLife.34152 (PMC6078493; doi:10.7554/eLife.34152)
Supplement: Figure 1—source data 1. [file elife-34152-fig1-data1.xlsx]

## Sheet: B
Background	Ki67+CK8+	DAPI+	ratio
Nikf/f PH	201	4980	0.0403614						Nikf/f	AlbCre-Nikf/f
Nikf/f PH	105	4290	0.0244755						0.0403614	0.109489
Nikf/f PH	1366	5252	0.260091						0.0244755	0.179625
Nikf/f PH	849	5379	0.157836						0.260091	0.14061
Nikf/f PH	1755	4862	0.360963						0.157836	0.217404
Nikf/f PH	837	4615	0.181365						0.360963	0.92587
Nikf/f PH	346	1678	0.206198						0.181365	1.2026
Nikf/f PH	400	2512	0.159236						0.206198	0.916279
Nikf/f PH	2289	906	0.395806						0.159236	1.03589
Nikf/f PH	2276	878	0.385764						0.395806	0.302513
Nikf/f PH	2712	1232	0.454277						0.385764	0.780769
Nikf/f PH	2623	1016	0.387343						0.454277	0.243994
Nikf/f PH	1280	276	0.215625						0.387343	0.284562
Nikf/f PH	2437	966	0.396389						0.215625	0.319921
Nikf/f PH	2143	670	0.312646						0.396389	0.327147
Nikf/f PH	2379	1004	0.422026						0.312646	0.559061
Nikf/f PH	2586	700	0.270688						0.422026	0.390965
Nikf/f PH	2862	872	0.304682						0.270688	0.151184
Nikf/f PH	1680	408	0.242857						0.304682	0.179208
Nikf/f PH	1449	392	0.270531						0.242857	0.326971
Nikf/f PH	1743	512	0.293746						0.270531	0.154773
Nikf/f PH	1842	470	0.255157						0.293746
Nikf/f PH	3372	166	0.0492289						0.255157
									0.0492289
AlbCre-Nikf/f PH	1918	210	0.109489
AlbCre-Nikf/f PH	1492	268	0.179625					P	0.0401712
AlbCre-Nikf/f PH	2034	286	0.14061					average		48h	96h		48h	96h
AlbCre-Nikf/f PH	3459	752	0.217404						NIKf/f	0.272458	0.215812	NIKf/f	27.2458	21.5812
AlbCre-Nikf/f PH	1322	1224	0.92587						AlbCre-NIKf/f	0.437442	0.281535	AlbCre-NIKf/f	43.7442	28.1535
AlbCre-Nikf/f PH	1229	1478	1.2026						SEM
AlbCre-Nikf/f PH	860	788	0.916279							NIKf/f	0.0241301	0.0319075	NIKf/f	2.41301	3.19075
AlbCre-Nikf/f PH	1616	1674	1.03589							AlbCre-NIKf/f	0.0691964	0.0346049	AlbCre-NIKf/f	6.91964	3.46049
AlbCre-Nikf/f PH	2228	674	0.302513
AlbCre-Nikf/f PH	1560	1218	0.780769
AlbCre-Nikf/f PH	1036	4246	0.243994
AlbCre-Nikf/f PH	1447	5085	0.284562
AlbCre-Nikf/f PH	652	2038	0.319921
AlbCre-Nikf/f PH	1375	4203	0.327147
AlbCre-Nikf/f PH	2428	4343	0.559061
AlbCre-Nikf/f PH	1852	4737	0.390965
AlbCre-Nikf/f PH	651	4306	0.151184
AlbCre-Nikf/f PH	643	3588	0.179208
AlbCre-Nikf/f PH	1439	4401	0.326971
AlbCre-Nikf/f PH	668	4316	0.154773

## Sheet: B1
basal
	f/f	Ki67	DAPI
		12	1612	0.00744417
		15	1600	0.009375
		16	2033	0.00787014
	Δhep	12	2118	0.00566572
		18	2016	0.00892857
		18	2035	0.00884521
		15	2040	0.00735294
	F/F	0.744417	0.9375	0.787014
	Δhep	0.566572	0.892857	0.884521
average
	F/F	0.822977
	Δhep	0.769811
SEM
	F/F	0.0478197
	Δhep	0.0665189
	p	0.605813

## Sheet: G
	NIK FF					average			NIK HKO					average
	TUNEL	6	7	4					TUNEL	2	5	8
	DAPI	1464	1498	1538					DAPI	1320	1550	1255
	RATIO	0.00409836	0.0046729	0.00260078		0.00379068			RATIO	0.00151515	0.00322581	0.0063745		0.00370515
	TUNEL	10	8	7					TUNEL	2	2	3
	DAPI	1356	1268	1222					DAPI	1681	1436	1351
	RATIO	0.00737463	0.00630915	0.00572831		0.0064707			RATIO	0.00118977	0.00139276	0.00222058		0.00160103
	TUNEL	10	8	5					TUNEL	3	3	3
	DAPI	1213	1332	1291					DAPI	1276	1244	1100
	RATIO	0.00824402	0.00600601	0.00387297		0.006041			RATIO	0.0023511	0.00241158	0.00272727		0.00249665
	TUNEL	4	2	7					TUNEL	3	4	5
	DAPI	1029	914	1091					DAPI	1467	1522	1526
	RATIO	0.00388727	0.00218818	0.00641613		0.00416386			RATIO	0.00204499	0.00262812	0.00327654		0.00264988
	TUNEL	2	2						TUNEL	8	3	3
	DAPI	1096	1080						DAPI	1400	1266	1428
	RATIO	0.00182482	0.00185185			0.00183833			RATIO	0.00571429	0.00236967	0.00210084		0.00339493
									TUNEL	7
									DAPI	1691
									RATIO	0.00413956				0.00413956
	f/f	0.00379068	0.0064707	0.006041	0.00416386	0.00183833
	Δhep	0.00370515	0.00160103	0.00249665	0.00264988	0.00339493	0.00413956
average
	f/f	0.00446091	NIK f/f	0.446091
	Δhep	0.00299787	NIK HKO	0.299787
SEM				0
	f/f	0.000747028	NIK f/f	0.0747028
	Δhep	0.000344997	NIK HKO	0.0344997
P		0.164962

## Sheet: I
For 2 days
ID	Cre+	BW	Liver weight	ratio			2 days
1	+	29.2	716	0.0245205			NIK HKO	NIK F/F
2	-	29.5	724	0.0245424			0.0245205	0.0245424
3	+	28.8	702	0.024375			0.024375	0.0234545		average	NIK F/F	NIK HKO	SEM	NIK F/F	NIK HKO
4	+	29	712	0.0245517			0.0245517	0.0241818		2	2.4706	2.51114		0.0467476	0.0544276
5	-	27.5	645	0.0234545			0.0233813	0.0252823		4	3.25188	3.77661		0.0894469	0.0702334
6	+	27.8	650	0.0233813			0.0241525	0.0227615
7	-	27.5	665	0.0241818			0.028107	0.0257317
8	-	24.8	627	0.0252823			0.026692	0.0269874
9	-	23.9	544	0.0227615
10	+	23.6	570	0.0241525		average	0.0251114	0.024706
11	-	24.6	633	0.0257317		SEM	0.000544276	0.000467476
12	-	23.9	645	0.0269874		p	0.633545
13	+	24.3	683	0.028107
14	+	26.3	702	0.026692
For 4 days
ID	Cre+	BW	Liver weight	ratio			NIK HKO	NIK F/F
1	-	28.6	813	0.0284266			0.0351948	0.0284266
2	-	30.1	917	0.0304651			0.0363279	0.0304651
3	-	30.8	1090	0.0353896			0.0364474	0.0353896
4	-	28.8	1040	0.0361111			0.0391696	0.0361111
5	+	30.8	1084	0.0351948			0.039924	0.0350442
6	+	30.5	1108	0.0363279			0.0387823	0.0316964
7	+	30.4	1108	0.0364474			0.0407115	0.0314943
8	+	28.9	1132	0.0391696			0.0355714	0.0315234
9	-	22.6	792	0.0350442
10	+	26.3	1050	0.039924		average	0.0377661	0.0325188
11	+	27.1	1051	0.0387823		SEM	0.000702334	0.000894469
12	+	25.3	1030	0.0407115		p	0.000802758
13	-	25.6	807	0.0315234
14	+	28	996	0.0355714
15	-	22.4	710	0.0316964
16	-	26.1	822	0.0314943
