# Supplementary material for: Hepatic NF-kB-inducing kinase (NIK) suppresses mouse liver regeneration in acute and chronic liver diseases
Source: eLife. 2018 Aug 2;7:e34152. doi: 10.7554/eLife.34152 (PMC6078493; doi:10.7554/eLife.34152)
Supplement: Figure 1—source data 2. [file elife-34152-fig1-data2.xlsx]

## Sheet: Summary
	HNF4	0.950133	0.970812	0.96769
	F4/80	0.0234944	0.0365781	0.0445533
average
	HNF4	0.962878	96.2878
	F4/80	0.0348753	3.48753
SEM
	HNF4	0.00525494	0.525494
	F4/80	0.00501209	0.501209
		To F4/80	to HNF4
P
	HNF4	5.22264e-08
	F4/80
