# Supplementary material for: Hepatic NF-kB-inducing kinase (NIK) suppresses mouse liver regeneration in acute and chronic liver diseases
Source: eLife. 2018 Aug 2;7:e34152. doi: 10.7554/eLife.34152 (PMC6078493; doi:10.7554/eLife.34152)
Supplement: Figure 2—figure supplement 1—source data 1. [file elife-34152-fig2-figsupp1-data1.xlsx]

## Sheet: A
			0			12h			24h			48			72
			1	2	3	1	2	3	1	2	3	1	2	3	1	2	3
		36b4	8.55	8.37	8.35	8.78	8.52	8.09	8.5	8.23	8.28	8.45	8.11	8.64	8.52	8.42	8.45
		NIK	31.41	31.37	32.19	29.47	29.13	28.7	29.64	29.11	28.34	29.87	28.99	28.88	30.96	31.25	31.01
	sub 36b4
		NIK	22.86	23	23.84	20.69	20.61	20.61	21.14	20.88	20.06	21.42	20.88	20.24	22.44	22.83	22.56
	average Ct
			0	12h	24h	48h	72h
		NIK	23.2333	20.6367	20.6933	20.8467	22.635
	Normalized
		NIK	-0.373333	-0.233333	0.606667	-2.54333	-2.62333	-2.62333	-2.09333	-2.35333	-3.17333	-1.81333	-2.35333	-2.99333	-0.793333	-0.403333	-0.673333	1.24469	4.9285	2.7034	4.63895	2.7851	1.95587
	fold change
		NIK	1.29534	1.17555	0.656712	5.82934	6.16172	6.16172	4.26733	5.11004	9.02129	3.51453	5.11004	7.96312	1.73307	1.32256	1.59475	0.421998	0.0328377	0.153531	0.0401363	0.145078	0.257765
	average of fold change
			0	0.5	1	2	3	5	7
		NIK	1.04253	6.05093	6.13288	5.52923	1.55013	0.202789	0.14766
	SEM
		NIK	0.160022	0.0904618	1.1958	1.06242	0.145139	0.0939044	0.0628372
	p
		NIK		2.41711e-05	0.0261736	0.027035	0.960523	0.0345974	0.0121762
	CK					5			7
36b4	14.3066	14.3089	14.443	14.4263	14.4001	14.5791	14.4011	14.4235	14.5551	24.2071	14.3295
NIK	31.5279	30.1146	32.1399	31.2163	30.6864	32.5838	36.0897	33.8869	35.9542	Undetermined	33.0454
36b4	17.2214	15.8057	17.6969	16.79	16.2863	18.0048	21.6886	19.4635	21.399		18.7159
average	16.7601
	0.461306	-0.954349	0.936824	0.0299683	-0.473749	1.24469	4.9285	2.7034	4.63895		1.95587

## Sheet: C1
		pJAK2	Total JAk2	pSTAT3	Total STAT3	pIKKa/b	IKKa/b	P52	Tubulin
	1	4463.45	5450.45	8078.02	7066.13	814.406	12958.4	1942.82	7032.31
	2	3479.67	2385.26	20027.2	12817.1	1124.99	11520.4	17848	10228.3
	3	3547.84	4737.1	8719.76	9377.38	3394.65	15580.7	11293.6	10933.7
	4	1869.26	3573.91	4109.69	7256.89	5853.06	11882.1	11902.3	10254.3
	5	4404.08	1534.72	16387.2	11409.8	4699.6	10393.3	2028.41	11386.3
	6	6105.45	2375.28	11554.3	9441.43	3666.18	12152.4	2132.77	5701.31
	7	1483.6	2026.03	11647.4	4412.48	6946.5	14764	18319.2	8080.43
	8	3826.79	1776.71	18167.9	9147.84	6675.96	19200	4132.48	7518.13
	9	3470.62	2184.35	21823.8	4643.48	6198.79	15052.4	3852.48	4691.48
	10	300.749	1989.26	1416.38	3836.77	7678.5	20339.3	3929.23	6801.01
	11	405.82	2002.83	5418.38	6040.89	8974.5	17015.8	1386.63	7451.31
	12	638.891	4059.74	2586.55	11227.4	11022.8	21871.5	5817.01	8463.84
	13	736.355	2199.48	5466.91	14674.2	9923.64	16913	14760.1	5989.72
	14	736.477	3233.22	3930.26	5202.48	11136.4	18203.4	5122.43	4833.01
	15	671.669	1155.72	7751.28	8287.84	5970.96	16394	2391.36	6468.43
	16	922.497	2184.91	9829.25	11733.8	3929.96	20786.4	4909.72	4086.6
	17	1436.33	1651.52	415.577	9370.38	8530.38	23633.5	5846.01	3563.01
	18	689.77	1228.62	645.355	2835.77	4245.83	20511.4	1635.48	5520.43
		0			1			2			3			5			7
	pJAK2	4463.45	3479.67	3547.84	1869.26	4404.08	6105.45	1483.6	3826.79	3470.62	300.749	405.82	638.891	736.355	736.477	671.669	922.497	1436.33	689.77
	Total JAk2	5450.45	2385.26	4737.1	3573.91	1534.72	2375.28	2026.03	1776.71	2184.35	1989.26	2002.83	4059.74	2199.48	3233.22	1155.72	2184.91	1651.52	1228.62
	pSTAT3	8078.02	20027.2	8719.76	4109.69	16387.2	11554.3	11647.4	18167.9	21823.8	1416.38	5418.38	2586.55	5466.91	3930.26	7751.28	9829.25	415.577	645.355
	Total STAT3	7066.13	12817.1	9377.38	7256.89	11409.8	9441.43	4412.48	9147.84	4643.48	3836.77	6040.89	11227.4	14674.2	5202.48	8287.84	11733.8	9370.38	2835.77
	pIKKa/b	814.406	1124.99	3394.65	5853.06	4699.6	3666.18	6946.5	6675.96	6198.79	7678.5	8974.5	11022.8	9923.64	11136.4	5970.96	3929.96	8530.38	4245.83
	IKKa	12958.4	11520.4	15580.7	11882.1	10393.3	12152.4	14764	19200	15052.4	20339.3	17015.8	21871.5	16913	18203.4	16394	20786.4	23633.5	20511.4
	P52	1942.82	17848	11293.6	11902.3	2028.41	2132.77	18319.2	4132.48	3852.48	3929.23	1386.63	5817.01	14760.1	5122.43	2391.36	4909.72	5846.01	1635.48
	Tubulin	7032.31	10228.3	10933.7	10254.3	11386.3	5701.31	8080.43	7518.13	4691.48	6801.01	7451.31	8463.84	5989.72	4833.01	6468.43	4086.6	3563.01	5520.43
	pJAK2/JAK2	0.818914	1.45882	0.748947	0.523028	2.86963	2.57042	0.732267	2.15386	1.58886	0.151187	0.202623	0.157372	0.334786	0.227784	0.58117	0.422212	0.8697	0.561419
	pSTAT3/STAT3	1.1432	1.56254	0.929872	0.566316	1.43624	1.22378	2.63966	1.98603	4.69989	0.369158	0.89695	0.230379	0.372553	0.755458	0.935259	0.837687	0.0443501	0.227577
	pIKKa-b/total IKKa	0.0628476	0.0976525	0.217876	0.492594	0.452176	0.301683	0.470504	0.347707	0.411813	0.377521	0.52742	0.50398	0.586748	0.611775	0.364217	0.189064	0.360944	0.206999
	IKKa/tubulin	1.8427	1.12633	1.42502	1.15875	0.912794	2.13152	1.82713	2.55382	3.20846	2.99062	2.28361	2.58411	2.82367	3.76647	2.53446	5.08647	6.63301	3.71554
	P52/tubulin	0.276271	1.74497	1.03292	1.16072	0.178145	0.374085	2.2671	0.549668	0.821165	0.577743	0.186092	0.687278	2.46424	1.05988	0.369697	1.20142	1.64075	0.296259
	average	0	1	2	3	5	7
	pJAK2/JAK2	1.0089	1.98769	1.49166	0.170394	0.381247	0.617777
	pSTAT3/STAT3	1.21187	1.07545	3.10853	0.498829	0.687757	0.369871
	pIKKa-b/total IKKa	0.126125	0.415484	0.410008	0.46964	0.520913	0.252336
	IKKa/tubulin	1.46468	1.40102	2.5298	2.61945	3.04153	5.14501
	P52/tubulin	1.01806	0.570982	1.21265	0.483704	1.29794	1.04614
Normalized		0	1	2	3	5	7
	pJAK2/JAK2	1	1.97017	1.47851	0.168892	0.377885	0.61233
	pSTAT3/STAT3	1	0.887425	2.56506	0.411618	0.567516	0.305207
	pIKKa-b/total IKKa	1	3.29422	3.2508	3.7236	4.13013	2.00068
	IKKa/tubulin	1	0.956536	1.7272	1.78841	2.07658	3.51272
	P52/tubulin	1	0.560856	1.19114	0.475126	1.27492	1.02759
SEM
	pJAK2/JAK2	0.184422	0.602092	0.337414	0.013238	0.0854261	0.107954
	pSTAT3/STAT3	0.151734	0.213799	0.667689	0.165791	0.13548	0.195807
	pIKKa-b/total IKKa	0.0383448	0.0474257	0.0289528	0.0380112	0.0642423	0.0445403
	IKKa/tubulin	0.169625	0.303806	0.325731	0.167269	0.303703	0.688069
	P52/tubulin	0.34623	0.245147	0.435211	0.124212	0.503165	0.323178
