# Supplementary material for: Hepatic NF-kB-inducing kinase (NIK) suppresses mouse liver regeneration in acute and chronic liver diseases
Source: eLife. 2018 Aug 2;7:e34152. doi: 10.7554/eLife.34152 (PMC6078493; doi:10.7554/eLife.34152)
Supplement: Figure 2—source data 1. [file elife-34152-fig2-data1.xlsx]

## Sheet: B
48h
	cyclin D1			tubulin	Ratio
1	2694.3		10	5444.43		0.494874
2	2427.72		11	10246.6		0.236929
3	9423.74		12	6090.18		1.54737
4	12706.9		13	10625.5		1.19588
5	11915.2		14	9746.67		1.22248
6	17901.7		15	7453.38		2.40183
7	18417.4		16	7523.84		2.44787
8	11421.9		17	6403.67		1.78364
average		SEM		P
f/f	0.868762		0.262977	0.04026	0.04026
Δhep	1.96396		0.251023

## Sheet: D
	NIKf/f	Alb-Cre NIKf/f
	1.88905	2.18245
	1.71623	1.25023
	2.3022	1.92657
	3.98713	1.39582
	1.7638	1.36161
		2.24324
	average	SEM	p
f/f	2.33168	0.381502
Δhep	1.72665	0.153084	0.244245

## Sheet: E
	IL-1	IL-6	IL-10	TNFa	36B4	sub
F/F	26.9334	27.3304	27.3909	27.1981	8.60415		3.03634e-06	2.30594e-06	2.21118e-06	2.52738e-06
	29.3634	27.6082	27.8783	28.7448	8.55427		5.44299e-07	1.83739e-06	1.52369e-06	8.35677e-07
	29.7048	27.5756	27.9618	29.9583	8.61586		4.48342e-07	1.96135e-06	1.50072e-06	3.76085e-07
	25.7327	26.4502	25.3168	25.3194	8.61164		7.0151e-06	4.26651e-06	9.35949e-06	9.34241e-06
	26.8586	27.7061	26.9243	24.9488	8.87461		3.85717e-06	2.14371e-06	3.68559e-06	1.44943e-05
KO	27.4192	27.8518	27.2464	25.9474	8.92757		2.71309e-06	2.01015e-06	3.05836e-06	7.52509e-06
	26.0198	27.1433	27.6696	24.0345	8.59536		5.68487e-06	2.60925e-06	1.81165e-06	2.25095e-05
	29.0583	27.9301	26.8729	28.8221	8.73507		7.62236e-07	1.66612e-06	3.46716e-06	8.97835e-07
	26.0574	26.4788	24.7828	25.8792	8.26585		4.40764e-06	3.29132e-06	1.06636e-05	4.98733e-06
	27.4752	26.585	25.8291	26.1121	8.74242		2.29551e-06	4.25447e-06	7.18468e-06	5.90467e-06
	f/f	1.01882	0.921279	0.604787	0.45826		2.98025e-06	2.50298e-06	3.65613e-06	5.51517e-06
		0.182635	0.734081	0.416749	0.151523
		0.150438	0.783607	0.410466	0.0681909		1.01882	0.921279	0.604787	0.45826
		2.35386	1.70457	2.55995	1.69395		0.182635	0.734081	0.416749	0.151523
		1.29424	0.856465	1.00806	2.62808		0.150438	0.783607	0.410466	0.0681909
	mean	1	1	1	1		2.35386	1.70457	2.55995	1.69395
	se	0.4068	0.178992	0.40481	0.500693		1.29424	0.856465	1.00806	2.62808
							0.910357	0.803104	0.836503	1.36443
	Δhep	0.910357	0.803104	0.836503	1.36443		1.90751	1.04246	0.495511	4.08138
		1.90751	1.04246	0.495511	4.08138		0.255762	0.665655	0.948313	0.162794
		0.255762	0.665655	0.948313	0.162794		1.47895	1.31496	2.91665	0.904293
		1.47895	1.31496	2.91665	0.904293		0.770241	1.69976	1.9651	1.07062
		0.770241	1.69976	1.9651	1.07062
	mean	1.06456	1.10519	1.43242	1.51671
	se	0.286953	0.185189	0.444633	0.671114
