# Supplementary material for: Hepatic NF-kB-inducing kinase (NIK) suppresses mouse liver regeneration in acute and chronic liver diseases
Source: eLife. 2018 Aug 2;7:e34152. doi: 10.7554/eLife.34152 (PMC6078493; doi:10.7554/eLife.34152)
Supplement: Figure 3—source data 1. [file elife-34152-fig3-data1.xlsx]

## Sheet: pSTAT3
			pSTAT3	STAT3	pSTAT3/STAT3
	Cre-		5835	3710	1.57278
			9257	5371	1.72352
			5777	4758	1.21417
			10851	3083	3.51962
			4015	2510	1.5996
	Cre+		13359	3921	3.40704
			13205	5162	2.55812
			12737	4068	3.13102
			8881	3518	2.52445
			12372	3919	3.15693
			19941	4116	4.84475
			average	SEM	P
		f/f	1.92594	0.364343
		Δhep	3.27038	0.315936	0.0348536

## Sheet: pJAK2
			pJak2	Jak2	pSTAT3/STAT3
	Cre-		2204.13	1854.21	1.18872
			3585.5	8963.72	0.400001
			5987.74	4009.77	1.49329
			8002.38	4626.6	1.72965
	Cre+
			10122.3	4636.72	2.18308
			8416.5	3829.48	2.19782
			4791.91	2746.18	1.74493
			5815.96	2335.36	2.4904
			average	SEM	P
		f/f	1.20291	0.224347
		Δhep	2.15406	0.10864	0.0376067
