# Supplementary material for: Hepatic NF-kB-inducing kinase (NIK) suppresses mouse liver regeneration in acute and chronic liver diseases
Source: eLife. 2018 Aug 2;7:e34152. doi: 10.7554/eLife.34152 (PMC6078493; doi:10.7554/eLife.34152)
Supplement: Figure 4—source data 1. [file elife-34152-fig4-data1.xlsx]

## Sheet: B
HKO					average	F/F						average
Ki67	152	124	168	113			Ki67	66	92	70
DAPI	876	1057	970	953			DAPI	1342	1281	1241
Ki67/DAPI	0.173516	0.117313	0.173196	0.118573	0.145649		Ki67/DAPI	0.0491803	0.0718189	0.0564061		0.0591351
Ki67	324	393	476	428			Ki67	101	91	147	109
DAPI	1545	1630	1513	1601			DAPI	907	1159	1212	1186
Ki67/DAPI	0.209709	0.241104	0.314607	0.267333	0.258188		Ki67/DAPI	0.111356	0.078516	0.121287	0.0919056	0.10372
Ki67	343	332	391	359			Ki67	253	190	182	320
DAPI	1283	1309	1432	1144			DAPI	1498	1500	1514	1477
Ki67/DAPI	0.267342	0.253629	0.273045	0.313811	0.276957		Ki67/DAPI	0.168892	0.126667	0.120211	0.216655	0.158106
Ki67	431	362	337	544			Ki67	346	268	300	357
DAPI	1268	1180	1224	1173			DAPI	1475	1470	1419	1587
Ki67/DAPI	0.339905	0.30678	0.275327	0.463768	0.346445		Ki67/DAPI	0.234576	0.182313	0.211416	0.224953	0.213315
						average
Ki67	393	350	285	395			Ki67	152	136
DAPI	1491	1371	1376	1438			DAPI	1331	1380
Ki67/DAPI	0.263581	0.255288	0.207122	0.274687		0.25017	Ki67/DAPI	0.1142	0.0985507			0.106375
Ki67	1145	884	692	635			Ki67	615	477	534	482
DAPI	1251	1383	1197	1191			DAPI	1289	1228	1308	1344
Ki67/DAPI	0.915268	0.63919	0.578112	0.533165		0.666434	Ki67/DAPI	0.477114	0.388436	0.408257	0.358631	0.432775
	f/f	0.0591351	0.10372	0.158106	0.213315	0.106375	0.432775
	Δhep	0.145649	0.258188	0.276957	0.346445	0.25017	0.666434
average
	f/f	0.178904	IKKa F/F	17.8904
	Δhep	0.323974	IKKa HKO	32.3974
SEM
	f/f	0.0503667	IKKa F/F	5.03667
	Δhep	0.0669927	IKKa HKO	6.69927
P		0.0443025

## Sheet: D
					f/f						Cre+
				Cyclin D1	837.234	490.749	932.962	877.062	610.406		938.77	989.82	3274.4	1353.13	1290.31
				Tubulin	5509.52	5557.69	6061.86	5577.28	6118.98		5739.28	6249.98	6209.28	6470.23	5645.79
				Ratio	0.151961	0.0883009	0.153907	0.157256	0.0997561		0.163569	0.158372	0.52734	0.209132	0.228543
				average ratio	0.130236	0.257391
				fold change	1.16681	0.678005	1.18175	1.20747	0.765962		1.25594	1.21603	4.0491	1.60579	1.75483
					f/f	Δhep
				average	1	1.97634
				SEM	0.102442	0.472429

## Sheet: E
	IKK FF					average	a		IKK HKO
	TUNEL	2	3	4	6				TUNEL	1	1	3					average
	DAPI	1447	1496	1389	1258				DAPI	1525	1573	1568
	RATIO	0.00138217	0.00200535	0.00287977	0.00476948	0.00275919			RATIO	0.000655738	0.000635728	0.00191327					0.00106824
	TUNEL	3	1	3					TUNEL	2	2	2
	DAPI	1440	1443	1460					DAPI	1457	1788	1575
	RATIO	0.00208333	0.000693001	0.00205479		0.00161038			RATIO	0.00137268	0.00111857	0.00126984					0.0012537
	TUNEL	5	5	1					TUNEL	5	4	2
	DAPI	1488	1455	1459					DAPI	1722	1788	1584
	RATIO	0.00336022	0.00343643	0.000685401		0.00249401			RATIO	0.0029036	0.00223714	0.00126263					0.00213445
	TUNEL	1	2	3					TUNEL	1	1	5	3	3	6	5
	DAPI	1464	1464	1484					DAPI	1319	1376	1140	1255	1306	1158	1264
	RATIO	0.00068306	0.00136612	0.00202156		0.00135691			RATIO	0.00075815	0.000726744	0.00438596	0.00239044	0.00229709	0.00518135	0.0039557	0.00195695
	TUNEL	7	11	7					TUNEL	2	6	6
	DAPI	1473	1620	1512					DAPI	1517	1806	1765
	RATIO	0.00475221	0.00679012	0.00462963		0.00539065			RATIO	0.00131839	0.00332226	0.00339943					0.00268003
	TUNEL	3	3	7					TUNEL	5	4	4
	DAPI	1639	1530	1436					DAPI	1468	1515	1531
	RATIO	0.00183038	0.00196078	0.00487465		0.00288861			RATIO	0.00340599	0.00264026	0.00261267					0.00288631
	f/f	0.00275919	0.00161038	0.00249401	0.00135691	0.00539065	0.00288861
	Δhep	0.00106824	0.0012537	0.00213445	0.00195695	0.00268003	0.00288631
average
	f/f	0.00274996	IKKa F/F	0.274996
	Δhep	0.00199661	IKKa HKO	0.199661
SEM				0
	f/f	0.00112267	IKKa F/F	0.112267
	Δhep	0.000815114	IKKa HKO	0.0815114
	p	0.287729

## Sheet: F
	Cre	BW	BW	liver weight
	+	28.6	26.6	562	0.935731	0.0211278
	+	29.7	27.4	618	0.990861	0.0225547
	-	32.9	29.7	627	0.907512	0.0211111
	-	28.3	25.8	500	0.841326	0.0193798
	+	25.3	23	529	0.995671	0.023
	+	30.5	28.6	812	1.26776	0.0283916
	-	30.6	28.1	750	1.16713	0.0266904
	+	28.6	25.7	616	1.02564	0.0239689
	-	31.3	-0.5
		30.25
	+	29.3	26.4	635	1.03202	0.024053
	-	28.6	26.1	558	0.929071	0.0213793
	-	31.5	28.3	629	0.950869	0.0222261
	-	30.3	27.7	588	0.924092	0.0212274
		f/f	0.907512	0.841326	0.929071	0.950869	0.924092
		Δhep	0.935731	0.990861	0.995671	1.26776	1.02564	1.03202
	average
		f/f	0.910574		0.734475
		Δhep	1.04128		0.835502
	SEM
		f/f	0.0166772		0.0191158
		Δhep	0.0432648		0.0309249
	P
			0.0397873
