# Supplementary material for: Hepatic NF-kB-inducing kinase (NIK) suppresses mouse liver regeneration in acute and chronic liver diseases
Source: eLife. 2018 Aug 2;7:e34152. doi: 10.7554/eLife.34152 (PMC6078493; doi:10.7554/eLife.34152)
Supplement: Figure 5—figure supplement 1—source data 1. [file elife-34152-fig5-figsupp1-data1.xlsx]

## Sheet: WT
		pJAK2	Total JAk2	pSTAT3	Total STAT3	pIKKa/b	IKKa/b	P52	Tubulin
	1	4463.45	5450.45	8078.02	7066.13	814.406	12958.4	1942.82	7032.31
	2	3479.67	2385.26	20027.2	12817.1	1124.99	11520.4	17848	10228.3
	3	3547.84	4737.1	8719.76	9377.38	3394.65	15580.7	11293.6	10933.7
	4	1869.26	3573.91	4109.69	7256.89	5853.06	11882.1	11902.3	10254.3
	5	4404.08	1534.72	16387.2	11409.8	4699.6	10393.3	2028.41	11386.3
	6	6105.45	2375.28	11554.3	9441.43	3666.18	12152.4	2132.77	5701.31
	7	1483.6	2026.03	11647.4	4412.48	6946.5	14764	18319.2	8080.43
	8	3826.79	1776.71	18167.9	9147.84	6675.96	19200	4132.48	7518.13
	9	3470.62	2184.35	21823.8	4643.48	6198.79	15052.4	3852.48	4691.48
	10	300.749	1989.26	1416.38	3836.77	7678.5	20339.3	3929.23	6801.01
	11	405.82	2002.83	5418.38	6040.89	8974.5	17015.8	1386.63	7451.31
	12	638.891	4059.74	2586.55	11227.4	11022.8	21871.5	5817.01	8463.84
	13	736.355	2199.48	5466.91	14674.2	9923.64	16913	14760.1	5989.72
	14	736.477	3233.22	3930.26	5202.48	11136.4	18203.4	5122.43	4833.01
	15	671.669	1155.72	7751.28	8287.84	5970.96	16394	2391.36	6468.43
	16	922.497	2184.91	9829.25	11733.8	3929.96	20786.4	4909.72	4086.6
	17	1436.33	1651.52	415.577	9370.38	8530.38	23633.5	5846.01	3563.01
	18	689.77	1228.62	645.355	2835.77	4245.83	20511.4	1635.48	5520.43
		0			1			2			3			5			7
	pJAK2	4463.45	3479.67	3547.84	1869.26	4404.08	6105.45	1483.6	3826.79	3470.62	300.749	405.82	638.891	736.355	736.477	671.669	922.497	1436.33	689.77
	Total JAk2	5450.45	2385.26	4737.1	3573.91	1534.72	2375.28	2026.03	1776.71	2184.35	1989.26	2002.83	4059.74	2199.48	3233.22	1155.72	2184.91	1651.52	1228.62
	pSTAT3	8078.02	20027.2	8719.76	4109.69	16387.2	11554.3	11647.4	18167.9	21823.8	1416.38	5418.38	2586.55	5466.91	3930.26	7751.28	9829.25	415.577	645.355
	Total STAT3	7066.13	12817.1	9377.38	7256.89	11409.8	9441.43	4412.48	9147.84	4643.48	3836.77	6040.89	11227.4	14674.2	5202.48	8287.84	11733.8	9370.38	2835.77
	pIKKa/b	814.406	1124.99	3394.65	5853.06	4699.6	3666.18	6946.5	6675.96	6198.79	7678.5	8974.5	11022.8	9923.64	11136.4	5970.96	3929.96	8530.38	4245.83
	IKKa	12958.4	11520.4	15580.7	11882.1	10393.3	12152.4	14764	19200	15052.4	20339.3	17015.8	21871.5	16913	18203.4	16394	20786.4	23633.5	20511.4
	P52	1942.82	17848	11293.6	11902.3	2028.41	2132.77	18319.2	4132.48	3852.48	3929.23	1386.63	5817.01	14760.1	5122.43	2391.36	4909.72	5846.01	1635.48
	Tubulin	7032.31	10228.3	10933.7	10254.3	11386.3	5701.31	8080.43	7518.13	4691.48	6801.01	7451.31	8463.84	5989.72	4833.01	6468.43	4086.6	3563.01	5520.43
	pJAK2/JAK2	0.818914	1.45882	0.748947	0.523028	2.86963	2.57042	0.732267	2.15386	1.58886	0.151187	0.202623	0.157372	0.334786	0.227784	0.58117	0.422212	0.8697	0.561419
	pSTAT3/STAT3	1.1432	1.56254	0.929872	0.566316	1.43624	1.22378	2.63966	1.98603	4.69989	0.369158	0.89695	0.230379	0.372553	0.755458	0.935259	0.837687	0.0443501	0.227577
	pIKKa-b/total IKKa	0.0628476	0.0976525	0.217876	0.492594	0.452176	0.301683	0.470504	0.347707	0.411813	0.377521	0.52742	0.50398	0.586748	0.611775	0.364217	0.189064	0.360944	0.206999
	IKKa/tubulin	1.8427	1.12633	1.42502	1.15875	0.912794	2.13152	1.82713	2.55382	3.20846	2.99062	2.28361	2.58411	2.82367	3.76647	2.53446	5.08647	6.63301	3.71554
	P52/tubulin	0.276271	1.74497	1.03292	1.16072	0.178145	0.374085	2.2671	0.549668	0.821165	0.577743	0.186092	0.687278	2.46424	1.05988	0.369697	1.20142	1.64075	0.296259
	average	0	1	2	3	5	7
	pJAK2/JAK2	1.0089	1.98769	1.49166	0.170394	0.381247	0.617777
	pSTAT3/STAT3	1.21187	1.07545	3.10853	0.498829	0.687757	0.369871
	pIKKa-b/total IKKa	0.126125	0.415484	0.410008	0.46964	0.520913	0.252336
	IKKa/tubulin	1.46468	1.40102	2.5298	2.61945	3.04153	5.14501
	P52/tubulin	1.01806	0.570982	1.21265	0.483704	1.29794	1.04614
Normalized		0	1	2	3	5	7
	pJAK2/JAK2	1	1.97017	1.47851	0.168892	0.377885	0.61233
	pSTAT3/STAT3	1	0.887425	2.56506	0.411618	0.567516	0.305207
	pIKKa-b/total IKKa	1	3.29422	3.2508	3.7236	4.13013	2.00068
	IKKa/tubulin	1	0.956536	1.7272	1.78841	2.07658	3.51272
	P52/tubulin	1	0.560856	1.19114	0.475126	1.27492	1.02759
SEM
	pJAK2/JAK2	0.184422	0.602092	0.337414	0.013238	0.0854261	0.107954
	pSTAT3/STAT3	0.151734	0.213799	0.667689	0.165791	0.13548	0.195807
	pIKKa-b/total IKKa	0.0383448	0.0474257	0.0289528	0.0380112	0.0642423	0.0445403
	IKKa/tubulin	0.169625	0.303806	0.325731	0.167269	0.303703	0.688069
	P52/tubulin	0.34623	0.245147	0.435211	0.124212	0.503165	0.323178

## Sheet: Summary JAK2
WT									KO
	Normalized		0	1	2	3	5	7			0	1	2	3	5	7
		pJAK2/JAK2	1	1.97017	1.47851	0.168892	0.377885	0.61233		pJAK2/JAK2	1	2.29147	2.14567	3.16119	0.870738	1.82591
		pSTAT3/STAT3	1	0.887425	2.56506	0.411618	0.567516	0.305207		pSTAT3/STAT3	1	2.1071	4.11581	1.14198	1.62582	1.8493
	SEM
		pJAK2/JAK2	0.118973	0.523888	0.321062	0.194391	0.0593847	0.0686538		pJAK2/JAK2	0.118973	0.40875	0.321062	0.0920646	0.0525861	0.0686538
		pSTAT3/STAT3	0.151734	0.213799	0.667689	0.165791	0.13548	0.195807		pSTAT3/STAT3	0.143808	0.193323	0.296519	0.103297	0.240429	0.161943
			0	1	2	3	5	7
		NIK f/f	1	1.97017	1.47851	0.168892	0.377885	0.61233
		Δhep	1	1.93475	2.14567	2.81531	0.956027	1.82591

## Sheet: psTAT3
WT									KO
	Normalized		0	1	2	3	5	7			0	1	2	3	5	7
		pJAK2/JAK2	1	1.97017	1.47851	0.168892	0.377885	0.61233		pJAK2/JAK2	1	2.29147	2.14567	3.16119	0.870738	1.82591
		pSTAT3/STAT3	1	0.887425	2.56506	0.411618	0.567516	0.305207		pSTAT3/STAT3	1	2.1071	4.11581	1.14198	1.62582	1.8493
	SEM
		pJAK2/JAK2	0.184422	0.602092	0.337414	0.013238	0.0854261	0.107954		pJAK2/JAK2	0.118973	0.40875	0.321062	0.0920646	0.0525861	0.0686538
		pSTAT3/STAT3	0.151734	0.213799	0.667689	0.165791	0.13548	0.195807		pSTAT3/STAT3	0.143808	0.193323	0.296519	0.103297	0.240429	0.161943
		pSTAT3/STAT3	0	1	2	3	5	7
		f/f	1	0.887425	2.56506	0.411618	0.567516	0.305207
		Δhep	1	2.1071	4.11581	1.14198	1.62582	1.8493

## Sheet: pIKK
WT									KO
	Normalized		0	1	2	3	5	7			0	1	2	3	5	7
		pJAK2/JAK2	1	1.97017	1.47851	0.168892	0.377885	0.61233		pJAK2/JAK2	1	2.29147	2.14567	3.16119	0.870738	1.82591
		pSTAT3/STAT3	1	0.887425	2.56506	0.411618	0.567516	0.305207		pSTAT3/STAT3	1	2.1071	4.11581	1.14198	1.62582	1.8493
	SEM
		pJAK2/JAK2	0.184422	0.602092	0.337414	0.013238	0.0854261	0.107954		pJAK2/JAK2	0.118973	0.40875	0.321062	0.0920646	0.0525861	0.0686538
		pSTAT3/STAT3	0.151734	0.213799	0.667689	0.165791	0.13548	0.195807		pSTAT3/STAT3	0.143808	0.193323	0.296519	0.103297	0.240429	0.161943
		pIKKa-b/total IKKa	0.0383448	0.0474257	0.0289528	0.0380112	0.0642423	0.0445403
		IKKa/tubulin	0.169625	0.303806	0.325731	0.167269	0.303703	0.688069
		P52/tubulin	0.34623	0.245147	0.435211	0.124212	0.503165	0.323178
		pJAK2/JAK2
			0.0383448	0.0474257	0.0289528	0.0380112	0.0642423	0.0445403
			0	1	2	3	5	7
		f/f	1	1.97017	1.47851	0.168892	0.377885	0.61233
		Δhep	1	2.29147	2.14567	3.16119	0.870738	1.82591
		pIKK	1	3.29422	3.2508	3.7236	4.13013	2.00068
