# Supplementary material for: Hepatic NF-kB-inducing kinase (NIK) suppresses mouse liver regeneration in acute and chronic liver diseases
Source: eLife. 2018 Aug 2;7:e34152. doi: 10.7554/eLife.34152 (PMC6078493; doi:10.7554/eLife.34152)
Supplement: Figure 5—figure supplement 1—source data 2. [file elife-34152-fig5-figsupp1-data2.xlsx]

## Sheet: Sheet2
IL6			p			total		p/t
-	f/f	gfp	261.849		1	6197.28		0.0422522			F/F						SEM	p	p
+	f/f	gfp	14303.6		2	5283.75		2.7071	64.07			ad-G	64.07	14.0195	8.52172	28.8704	10.2025	0.0499128
-	f/f	NIK	824.891		3	6724.58		0.122668				ad-N	5.67903	5.32836	2.60393	4.53711	0.793531		0.00164753
+	f/f	NIK	4581.28		4	6576.28		0.696636	5.67903		KO
-	KO	gfp	245.092		5	6620.99		0.0370174				ad-G	68.954	75.5189	30.9844	58.4857	11.3335	0.0228102
+	KO	gfp	16682		6	6535.58		2.5525	68.954			ad-N	16.012	13.8682	21.3128	17.0643	1.80654
-	KO	NIK	743.941		7	7008.58		0.106147				GFP	NIK	inhibiton
+	KO	NIK	12329.6		8	7254.28		1.69962	16.012		f/f	28.8704	4.53711	0.842846
-	f/f	gfp	1338.62		9	6656.16		0.20111			Δhep	58.4857	17.0643	0.708231
+	f/f	gfp	19506.7		10	6918.58		2.81946	14.0195
-	f/f	NIK	159.607		11	6601.58		0.0241771
+	f/f	NIK	813.062		12	6311.41		0.128824	5.32836
-	KO	gfp	150.536		13	5411.28		0.0278189
+	KO	gfp	12716.4		24	6052.99		2.10085	75.5189
-	KO	NIK	849.79		25	5786.41		0.14686
+	KO	NIK	12031.9		16	5907.58		2.03668	13.8682
-	f/f	gfp	1045.48		17	4164.92		0.25102
+	f/f	gfp	9747.33		18	4556.7		2.13912	8.52172
-	f/f	NIK	178.536		19	4477.94		0.0398701
+	f/f	NIK	472.627		20	4552.41		0.103819	2.60393
-	KO	gfp	335.648		21	4372.28		0.0767672
+	KO	gfp	9841.57		22	4137.58		2.37858	30.9844
-	KO	NIK	300.506		23	3998.53		0.0751542
+	KO	NIK	7530.74		24	4701.58		1.60175	21.3128
