# Supplementary material for: Hepatic NF-kB-inducing kinase (NIK) suppresses mouse liver regeneration in acute and chronic liver diseases
Source: eLife. 2018 Aug 2;7:e34152. doi: 10.7554/eLife.34152 (PMC6078493; doi:10.7554/eLife.34152)
Supplement: Figure 5—source data 1. [file elife-34152-fig5-data1.xlsx]

## Sheet: combine
IKKa		p	total	p/t	average		F/F	Δhep
STAT3	f/f	1633.94	4849.91	0.336901		p/t STAT3	0.730613	2.53244
		1844.89	3358.5	0.54932		p/t JAK2	0.367937	0.88121
		2365.13	2248.77	1.05175	SEM
		8892.88	11814.1	0.752738		p/t STAT3	0.107901	0.814329
		13228.1	13622.6	0.971036		p/t JAK2	0.0906228	0.0956978
		12742.4	17650.2	0.72194	P
	Δhep	7258.76	4240.4	1.71181		p/t STAT3		0.0498202
		14511.8	4630.57	3.13392		p/t JAK2		0.0052479
		11913.2	1775.16	6.71107
		13229.9	14731.3	0.898077
		18414	13786.5	1.33566
		16559.6	11793.7	1.4041
JAK2	f/f	4121.31	17097.2	0.241051
		5455.93	11439.1	0.476956
		1667.77	9240	0.180495
		685.113	4903.64	0.139715
		2484.62	3134.64	0.792633
		1288.23	3419.1	0.376775
	Δhep	7273.4	10651.8	0.682835
		6994.69	10358.1	0.675285
		6846.28	5075.52	1.34888
		3587.03	4210.57	0.851912
		3158.74	4232.4	0.746324
		2053.08	2090.67	0.982022
