# Supplementary material for: Hepatic NF-kB-inducing kinase (NIK) suppresses mouse liver regeneration in acute and chronic liver diseases
Source: eLife. 2018 Aug 2;7:e34152. doi: 10.7554/eLife.34152 (PMC6078493; doi:10.7554/eLife.34152)
Supplement: Figure 6—figure supplement 1—source data 1. [file elife-34152-fig6-figsupp1-data1.xlsx]

## Sheet: SECTED
Ear Tag	Sex	Strain	Genotype	PH at 4/24/2015	Liver been cutted( left and median)	Liver Weght of Left( right and Caudate)
1016	M	NIK-HKO	-	27.6	782	571	0.0283333	0.0206884
1017	M	NIK-HKO	+	26.4	708	520	0.0268182	0.019697
1018	M	NIK-HKO	-	27.3	715	507	0.0261905	0.0185714
1027	M	NIK-HKO	-	28.8	796	524	0.0276389	0.0181944
1028	M	NIK-HKO	+	26.1	705	524	0.0270115	0.0200766
1029	M	NIK-HKO	+	27.9	784		0.0281004
1030	M	NIK-HKO	-		Died during surgery		#VALUE!	#DIV/0!
1032	M	NIK-HKO	-	29.6	875	500	0.0295608	0.0168919
Ear Tag	Sex	Genotype		BW( at 1/28 before xPH)	PH time(1/28/2015)	liver weight at 1/30
1137	M	NIK-HKO	-	32.5	11	480		0.0147692
1138	M	NIK-HKO	+	30.1	11.45	702		0.0233223
1139	M	NIK flox/flox		30.7	12.15(died at 1/30 night)			0
1134	M	NIK-HKO	-	34.5	1.3	732		0.0212174
1135	M	NIK flox/flox		28.2	12.5(died at 1/30 night)			0
1136	M	NIK-HKO		32	2.1(died not recovery)			0
1130	M	NIK-HKO	+	32	2.5	634		0.0198125
1133	M	NIK-HKO		2014-10-12		26.7	26.1	3.25(died at 1/30 night)
		AAF growth rate
	NIK f/f	0.0283333	0.0261905	0.0276389	0.0295608
	Δhep	0.0268182	0.0270115	0.0281004
	NIK f/f	0.0279309	0.0279309
	Δhep	0.02731	0.02731
	NIK f/f	0.000608939	0.000608939
	Δhep	0.000325859	0.000325859
P		0.480561

## Sheet: BW
Ear Tag	Sex	Strain	Genotype	PH at 4/24/2015	Liver been cutted( left and median)	Liver Weght of Left( right and Caudate)
1	M	NIK-HKO	-	27.6	782	571	0.730179		0.0206884
2	M	NIK-HKO	+	26.4	708	520	0.734463		0.019697
3	M	NIK-HKO	-	27.3	715	507	0.709091		0.0185714
4	M	NIK-HKO	-	28.8	796	524	0.658291		0.0181944
5	M	NIK-HKO	+	26.1	705	524	0.743262		0.0200766
6	M	NIK-HKO	+	27.9	784	Died at 4/25
7	M	NIK-HKO	-		Died during surgery		#VALUE!		#DIV/0!
8	M	NIK-HKO	-	29.6	875	500	0.571429		0.0168919
9	Sex	Genotype		BW( at 1/28 before xPH)	PH time(1/28/2015)	liver weight at 1/30
10	M	NIK-HKO	-	32.5	11	480	703.5		0.0147692
11	M	NIK-HKO	+	30.1	11.45	702			0.0233223
12	M	NIK flox/flox		30.7	12.15(died at 1/30 night)				0
13	M	NIK-HKO	-	34.5	1.3	732			0.0212174
14	M	NIK flox/flox		28.2	12.5(died at 1/30 night)				0
15	M	NIK-HKO		32	2.1(died not recovery)				0
16	M	NIK-HKO	+	32	2.5	634			0.0198125
1133	M	NIK-HKO		26.1	3.25(died at 1/30 night)	2015-01-30
		AAF growth rate
	NIK f/f	0.0206884	0.0185714	0.0185714	0.0181944	0.0168919	0.0147692
	Δhep	0.019697	0.0200766	0.0233223	0.0198125
	NIK f/f	0.0179478	0.0179478
	Δhep	0.0207271	0.0207271
	NIK f/f	0.000545667	0.000545667
	Δhep	0.000752314	0.000752314
P		0.092857	9.2857
