# Supplementary material for: Hepatic NF-kB-inducing kinase (NIK) suppresses mouse liver regeneration in acute and chronic liver diseases
Source: eLife. 2018 Aug 2;7:e34152. doi: 10.7554/eLife.34152 (PMC6078493; doi:10.7554/eLife.34152)
Supplement: Figure 6—figure supplement 1—source data 2. [file elife-34152-fig6-figsupp1-data2.xlsx]

## Sheet: Sected
				cut	after
1	M	-	33.5	704	735	0.0210149		0.0210149
2	M	+	35.6	721	829	0.0202528		0.0202528
3	M	+	42.8			0		0
4	M	-	39.5	880	615	0.0222785		0.0222785
5	M	-	47	988	906	0.0210213		0.0210213
6	M	+	49			0		0
7	M	-	38.3	799	693	0.0208616		0.0208616
8	M	+	41.2	822	778	0.0199515		0.0199515
9	M	+	46.5	996	940	0.0214194		0.0214194
10	M	+	46.1	948	738	0.020564		0.020564
11	M	-	46.4	977	762	0.021056		0.021056
12	M	+	29	609	626	0.021		0.021
13	M	-	33.7	727	469	0.0215727		0.0215727
14	M	-	31.9			0		0
15	M	+	36.6			0		0
16	M	+	33.5	703	588	0.0209851		0.0209851
	NIK f/f	0.0210149	0.0222785	0.0210213	0.0208616	0.021056	0.0215727
	Δhep	0.0202528	0.0199515	0.0214194	0.021056	0.021	0.0209851
average
	NIK f/f	0.0213008
	Δhep	0.0207775
SEM	NIK f/f	0.000490312
	Δhep	0.00050659
		0.127932

## Sheet: BW
				cut	after
1	M	-	33.5	704	735	0.0219403		1.04403
2	M	+	35.6	721	829	0.0232865		1.14979
3	M	+	42.8			0		#DIV/0!
4	M	-	39.5	880	615	0.0155696		0.698864
5	M	-	47	988	906	0.0192766		0.917004
6	M	+	49			0		#DIV/0!
7	M	-	38.3	799	693	0.018094		0.867334
8	M	+	41.2	852	778	0.0188835		0.913146
9	M	+	46.5	996	940	0.0202151		0.943775
10	M	+	46.1	948	738	0.0160087		0.778481
11	M	-	46.4	977	762	0.0164224		0.779939
12	M	+	29	609	626	0.0215862		1.02791
13	M	-	33.7	727	469	0.0139169		0.645117
14	M	-	31.9			0		#DIV/0!
15	M	+	36.6			0		#DIV/0!
16	M	+	33.5	703	588	0.0175522		0.836415
	F/F	0.0219403	0.0155696	0.0192766	0.018094	0.0164224	0.0139169
	HKO	0.0232865	0.0188835	0.0202151	0.0164224	0.0215862	0.0175522
average
	F/F	0.0175366
	HKO	0.0196577
SEM		0.00130613
		0.000953029
		0.205977
