# Supplementary material for: Hepatic NF-kB-inducing kinase (NIK) suppresses mouse liver regeneration in acute and chronic liver diseases
Source: eLife. 2018 Aug 2;7:e34152. doi: 10.7554/eLife.34152 (PMC6078493; doi:10.7554/eLife.34152)
Supplement: Figure 6—source data 1. [file elife-34152-fig6-data1.xlsx]

## Sheet: B
AAF
		0.0240947	0.0164269	0.0121369	0.021829	0.021691	f/f	2.40947	1.64269	1.21369	2.1829	2.1691
		0.00880557	0.0262979	0.01384	0.0203705		Δhep	0.880557	2.62979	1.384	2.03705
average						average
	f/f	0.0192357					f/f	1.92357
	Δhep	0.0173285					Δhep	1.73285
						SEM
							f/f	0.194571
							Δhep	0.330259

## Sheet: D
f/f								HKO
Ki67+	1195	1484	1232	1259				Ki67+	1122	1288	1048	1171	1185
DAPi+	396	562	463	529				DAPi+	293	417	386	310	384
Ki67+/CK8+	391	559	461	519				Ki67+/DAPI	0.261141	0.323758	0.368321	0.264731	0.324051
Ki67+/DAPI	0.331381	0.378706	0.375812	0.420175
Ki67+	1342	1227	1268	1064	1276			Ki67+	1011	1076	1062	1078	1173
DAPi+	252	262	269	150	254			DAPi+	197	198	137	204	234
Ki67+/CK8+	248	214	261	117	202			Ki67+/DAPI	0.194857	0.184015	0.129002	0.189239	0.199488
Ki67+/DAPI	0.187779	0.213529	0.212145	0.140977	0.19906
									Ki67+	220	274	153	246
									DAPi+	1049	1272	942	1140
Ki67+	1259	1293	1308	1405	1415				Ki67+/DAPI	0.209724	0.215409	0.16242	0.215789
DAPi+	27	36	32	45	33
Ki67+/CK8+	27	35	28	36	30				Ki67+	166	188	182	152
Ki67+/DAPI	0.0214456	0.0278422	0.0244648	0.0320285	0.0233216				DAPi+	1154	1265	1395	1264
									Ki67+/DAPI	0.143847	0.148617	0.130466	0.120253
Ki67+	1360	1397	1312	1092	1159
DAPi+	40	26	28	19	36			Ki67+	218	278	256	288
Ki67+/CK8+	29	19	27	16	26			DAPi+	1144	1164	1163	1165
Ki67+/DAPI	0.0294118	0.0186113	0.0213415	0.0173993	0.0310613			Ki67+/CK8+
								Ki67+/DAPI	0.190559	0.238832	0.22012	0.24721
	Ki67+	77	50	53	68	27
	DAPi+	1304	1351	1406	1350	1284
	Ki67+/CK8+
	Ki67+/DAPI	0.0590491	0.0370096	0.0376956	0.0503704	0.021028
	summary
	NIK f/f	0.331381	0.378706	0.375812	0.420175	0.187779	0.213529	0.212145	0.140977	0.19906	0.0214456	0.0278422	0.0244648	0.0320285	0.0233216	0.190559	0.238832	0.22012	0.24721	0.0590491	0.0370096	0.0376956	0.0503704	0.021028	0.0294118	0.0186113	0.0213415	0.0173993	0.0310613
	NIK HKO	0.261141	0.323758	0.368321	0.264731	0.324051	0.194857	0.184015	0.129002	0.189239	0.199488	0.209724	0.215409	0.16242	0.215789	0.143847	0.148617	0.130466	0.120253	0.190559	0.238832	0.22012	0.24721
average				f/f	30.3883
	f/f	0.136013		f/f AAF	13.6013
	Δhep	0.212811		Δhep AAF	21.2811
SEM
				f/f	2.14238
	f/f	0.0241408		f/f AAF	2.41408
	Δhep	0.0152425		Δhep AAF	1.52425
P		0.00972653

## Sheet: E
Ear Tag	Sex	Strain	BW	PH at 4/24/2015	Liver been cutted( left and median)	Liver Weght of Left( right and Caudate)
1016	M	NIK-HKO		27.6	782	571	0.730179		0.0206884
1017	M	NIK-HKO		26.4	708	520	0.734463		0.019697
1018	M	NIK-HKO		27.3	715	507	0.709091		0.0185714
1027	M	NIK-HKO		28.8	796	524	0.658291		0.0181944
1028	M	NIK-HKO		26.1	705	524	0.743262		0.0200766
1029	M	NIK-HKO		27.9	784	Died at 4/25			#VALUE!
1030	M	NIK-HKO			Died during surgery		#VALUE!		#DIV/0!
1032	M	NIK-HKO		29.6	875	500	0.571429		0.0168919
Ear Tag	Sex	Genotype	BW(at 1/18before AAF)	BW( at 1/28 before xPH)	PH time(1/28/2015)	liver weight at 1/30
1137	M	NIK-HKO	33.5	32.5	11	480	703.5	0.682303	0.0147692
1138	M	NIK-HKO	30.9	30.1	11.45	702	648.9	1.08183	0.0233223
1139	M	NIK flox/flox	30.7	30.7	12.15(died at 1/30 night)		644.7	0	0
1134	M	NIK-HKO	35.6	34.5	1.3	732	747.6	0.979133	0.0212174
1135	M	NIK flox/flox	28.5	28.2	12.5(died at 1/30 night)		598.5	0	0
1136	M	NIK-HKO	32.7	32	2.1(died not recovery)		686.7	0	0
1130	M	NIK-HKO	33.2	32	2.5	634	697.2	0.909352	0.0198125
1133	M	NIK-HKO		2014-10-12		26.7	26.1	3.25(died at 1/30 night)	2015-01-30
		AAF growth rate
	f/f	0.730179	0.709091	0.658291	0.571429	0.682303	0.670259
	Δhep	0.734463	0.743262	1.08183	0.909352	0.979133	0.889608
	f/f	0.670259	67.0259
	Δhep	0.889608	88.9608
	f/f	0.0246204	2.46204
	Δhep	0.0602797	6.02797
P		0.0275605	2.75605
