# Supplementary material for: Hepatic NF-kB-inducing kinase (NIK) suppresses mouse liver regeneration in acute and chronic liver diseases
Source: eLife. 2018 Aug 2;7:e34152. doi: 10.7554/eLife.34152 (PMC6078493; doi:10.7554/eLife.34152)
Supplement: Figure 7—source data 1. [file elife-34152-fig7-data1.xlsx]

## Sheet: A
HKO mice fed with HFD for 12 weeks							total	protein
	NIK	1	2	average	sub EMPTY	Conc.(mM)	mg	mg	ratio(mg/g)
	-	0.146	0.152	0.149	0.0775	0.00407125	0.0144121	68	0.211943
	+	0.152	0.152	0.152	0.0805	0.0229218	0.0811425	58	1.39901
	-	0.256	0.255	0.2555	0.184	0.673264	2.38334	54	44.1359
	-	0.241	0.238	0.2395	0.168	0.572728	2.02745	52	38.9893
	-	0.313	0.317	0.315	0.2435	1.04713	3.70683	56	66.1933
	-	0.399	0.392	0.3955	0.324	1.55295	5.49743	55	99.9532
	+	0.529	0.577	0.553	0.4815	2.54261	9.00077	66	136.375
	+	0.63	0.647	0.6385	0.567	3.07984	10.9026	77	141.592
	+	0.245	0.247	0.246	0.1745	0.613571	2.17203	69	31.4787
	+	0.256	0.24	0.248	0.1765	0.626138	2.21652	55	40.3003
Empty		0.072	0.071	0.0715	0
						WT		value	glycerol (ug/ul)	TAG(ug/ul)	total TAG (mg)	tissue weight (mg)	TAG content (mg/mg)
	Δhep	NIKf/f	Δhep
	0.211943	136.375	0.211943			2839	0.106	0.123	0.035249	0.338712	1.01614	51	0.0199243	19.9243
	38.9893	141.592	38.9893			2840	0.115	0.123	0.035249	0.338712	1.01614	48	0.0211695	21.1695
	99.9532	31.4787	99.9532			2841	0.109	0.123	0.035249	0.338712	1.01614	43	0.0236311	23.6311
	44.1359	40.3003	44.1359			2842	0.115	0.123	0.035249	0.338712	1.01614	49	0.0207375	20.7375
	66.1933	1.39901	66.1933										0.0213656	21.3656
			0										0.000618179	0.618179
			0
average	49.8968	70.2291	49.8968
SEM	23.2206	21.78	23.2206
						Δhep
		Chow	HFD
	F/F	21.3656	70.2291			2849	0.118	0.123	0.035249	0.338712	1.01614	41	0.0247838	24.7838
	Δhep	23.4369	49.8968			2850	0.115	0.123	0.035249	0.338712	1.01614	46	0.0220899	22.0899
						2851	0.113	0.123	0.035249	0.338712	1.01614	46	0.0220899	22.0899
		0.618179	21.78			2852	0.117	0.123	0.035249	0.338712	1.01614	41	0.0247838	24.7838
		0.602373	23.2206										0.0234369	23.4369
													0.000602373	0.602373

## Sheet: D
Before							after
Δhep		1	2	3	4
	Ki67	28	25	28	16		319	218	252	242
	KI67+/CK8+	24	23	25	13		317	218	245	247
	DAPI	1110	1023	1131	1022		1010	1046	1093	1011
	Ratio	0.0252252	0.0244379	0.0247569	0.0156556		0.313861	0.208413	0.224154	0.244313
f/f
	Ki67	24	42	37	26		252	238	304	312
	KI67+/CK8+	24	40	32	22		246	223	299	310
	DAPI	1253	1331	1223	1131		1558	1281	1597	1333
	Ratio	0.019154	0.0315552	0.0302535	0.0229885		0.157895	0.174083	0.187226	0.232558
Δhep
	Ki67						447	345	381	333
	KI67+/CK8+
	DAPI						1181	1086	1176	1254
	Ratio						0.378493	0.31768	0.32398	0.26555
								Average	SD.P
			Δhep	0.313861	0.208413	0.224154	0.244313	0.247685	0.04027
			NIK-Flox	0.157895	0.174083	0.187226	0.232558	0.18794	0.027776
before
F/F	1.9154	3.15552	3.02535	2.29885
Δhep	2.52252	2.44379	2.47569	1.56556
average
F/F	2.59878
Δhep	2.25189
SEM
F/F	0.256038
Δhep	0.198621

## Sheet: E
ff								HKO
DAPI	1195	1484	1232	1259				DAPI	1122	1288	1048	1171	1185
KI67+	396	562	463	529				KI67+	293	417	386	310	384
KI67+/CK8+	391	559	461	519				KI67+/CK8+	293	415	382	308	258
	0.331381	0.378706	0.375812	0.420175					0.261141	0.323758	0.368321	0.264731	0.324051
ff
DAPI	1342	1227	1268	1064	1276			HKO
KI67+	252	262	269	150	254			DAPI	1011	1076	1062	1078	1173
KI67+/CK8+	248	214	261	117	202			KI67+	197	198	137	204	234
	0.187779	0.213529	0.212145	0.140977	0.19906			KI67+/CK8+	189	198	137	190	191
									0.194857	0.184015	0.129002	0.189239	0.199488
ff								HKO
DAPI	1259	1293	1308	1405	1415			after	Ki67+	220	274	153	246
KI67+	27	36	32	45	33				DAPi+	1049	1272	942	1140
KI67+/CK8+	27	35	28	36	30				Ki67+/CK8
	0.0214456	0.0278422	0.0244648	0.0320285	0.0233216				Ki67+/DAPI	0.209724	0.215409	0.16242	0.215789
								HKO
ff	1360	1397	1312	1092	1159			after	Ki67+	166	188	182	152
DAPI	40	26	28	19	36				DAPi+	1154	1265	1395	1264
KI67+	29	19	27	16	26				Ki67+/CK8
KI67+/CK8+	0.0294118	0.0186113	0.0213415	0.0173993	0.0310613				Ki67+/DAPI	0.143847	0.148617	0.130466	0.120253
ff
after	Ki67+	218	278	256	288
	DAPi+	1144	1164	1163	1165
	Ki67+/CK8+
	Ki67+/DAPI	0.190559	0.238832	0.22012	0.24721
ff
after	Ki67+	77	50	53	68	27
	DAPi+	1304	1351	1406	1350	1284
	Ki67+/CK8+
	Ki67+/DAPI	0.0590491	0.0370096	0.0376956	0.0503704	0.021028
	summary
	NIK f/f HFP	0.331381	0.378706	0.375812	0.420175	0.187779	0.213529	0.212145	0.140977	0.19906	0.0214456	0.0278422	0.0244648	0.0320285	0.0233216	0.190559	0.238832	0.22012	0.24721	0.0590491	0.0370096	0.0376956	0.0503704	0.021028	0.0294118	0.0186113	0.0213415	0.0173993	0.0310613
	Δhep HFP	0.261141	0.323758	0.368321	0.264731	0.324051	0.194857	0.184015	0.129002	0.189239	0.199488	0.209724	0.215409	0.16242	0.215789	0.143847	0.148617	0.130466	0.120253
average				NIKf/f	30.3883
	NIK f/f HFP	0.136013		NIK f/f HFP	13.6013
	Δhep HFP	0.210285		Δhep HFP	21.0285
SEM
				NIKf/f	2.14238
	NIK f/f HFP	0.0241408		NIK f/f HFP	2.41408
	Δhep HFP	0.0166185		Δhep HFP	1.66185
P		0.0170935

## Sheet: F
			BW		cut	after
1039	M	-	33.5		704	735	1.04403		1.04403
1040	M	+	35.6		721	829	1.14979		1.14979
1041	M	+	42.8				#DIV/0!		#DIV/0!
1042	M	-	39.5		880	615	0.698864		0.698864
1053	M	-	47		988	906	0.917004		0.917004
1052	M	+	49				#DIV/0!		#DIV/0!
1054	M	-	38.3		799	693	0.867334		0.867334
1057	M	+	41.2		852	778	0.913146		0.913146
1055	M	+	46.5		996	940	0.943775		0.943775
1058	M	+	46.1		948	738	0.778481		0.778481
1056	M	-	46.4		977	762	0.779939		0.779939
1000	M	+	29		609	626	1.02791		1.02791
1001	M	-	33.7		727	469	0.645117		0.645117
1003	M	-	31.9				#DIV/0!		#DIV/0!
1004	M	+	36.6				#DIV/0!		#DIV/0!
1005	M	+	33.5		703	588	0.836415		0.836415
	NIK f/f		0.698864	0.917004	0.867334	0.779939	0.645117
	Δhep		0.913146	0.943775	1.14979	1.02791	0.836415
average
	NIK f/f	0.781651
	Δhep	0.974209
SEM		0.0505768
		0.0437248
		0.0310159
