# Supplementary figures and images for: Hepatic NF-kB-inducing kinase (NIK) suppresses mouse liver regeneration in acute and chronic liver diseases
Source: eLife journal article supplement (doi:10.7554/elife.34152), 2018-08-01

Figure 2-figure supplement 1

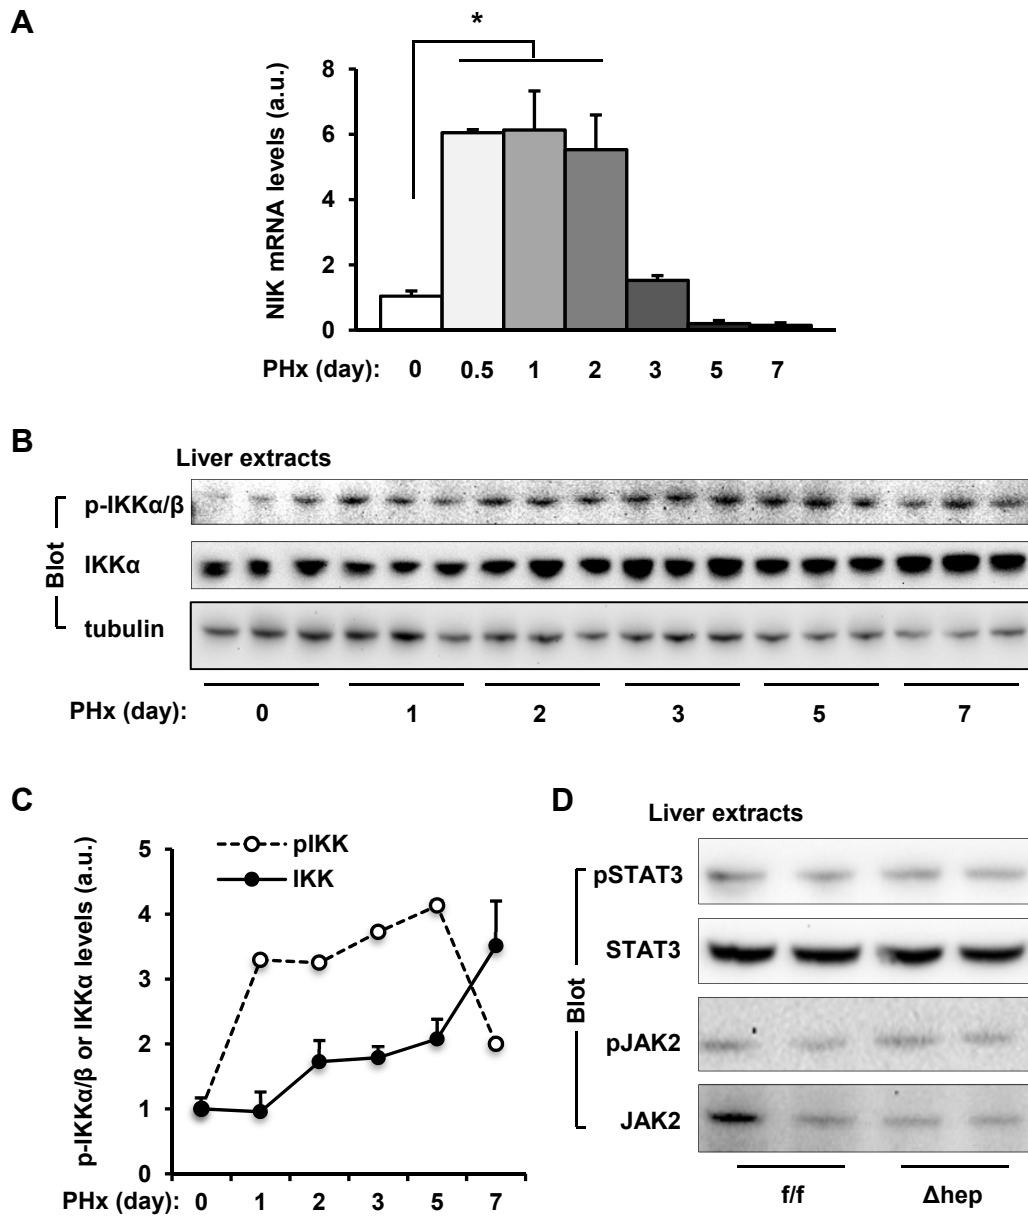

Supplement: supp [file elife-34152-supp-v1.zip]

Figure 6-figure supplement 1

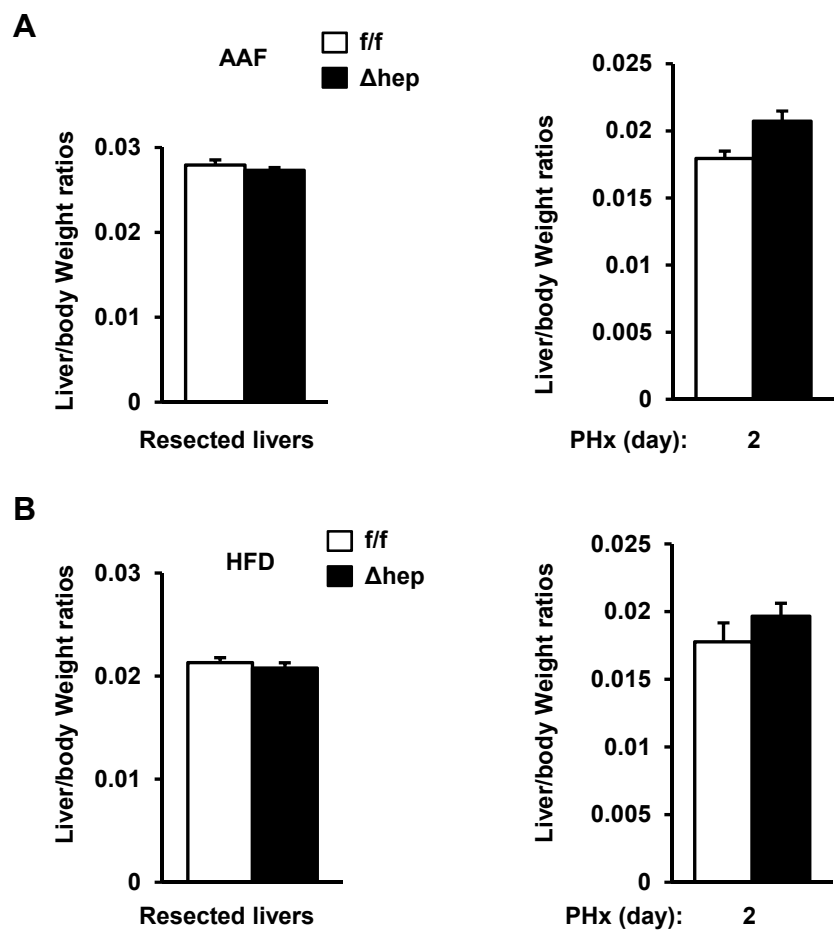

Supplement: supp [file elife-34152-supp-v1.zip]

Figure 5-figure supplement 1

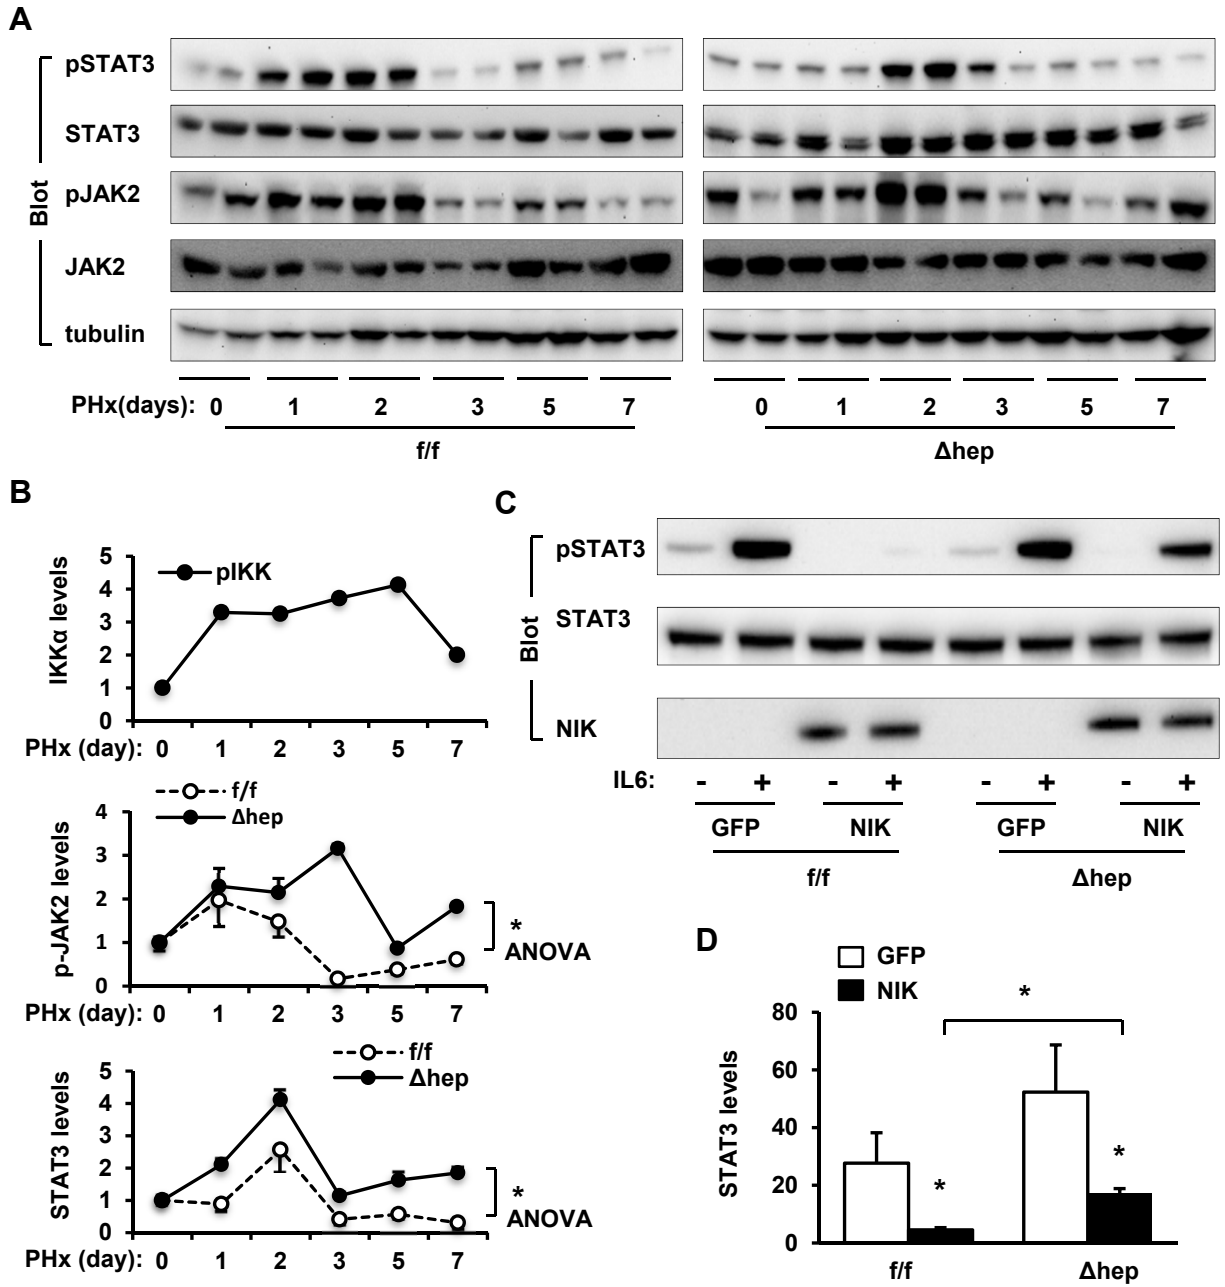

Supplement: supp [file elife-34152-supp-v1.zip]
